# Supplementary material for: FKBPL: a marker of good prognosis in breast cancer
Source: PubMed Central journal article supplement (PMC4494933; doi:10.18632/oncotarget.3528), 2015-04-03
Supplement: oncotarget-06-12209-s001.pdf [file oncotarget-06-12209-s001.pdf]

SUPPLEMENTARY FIGURES

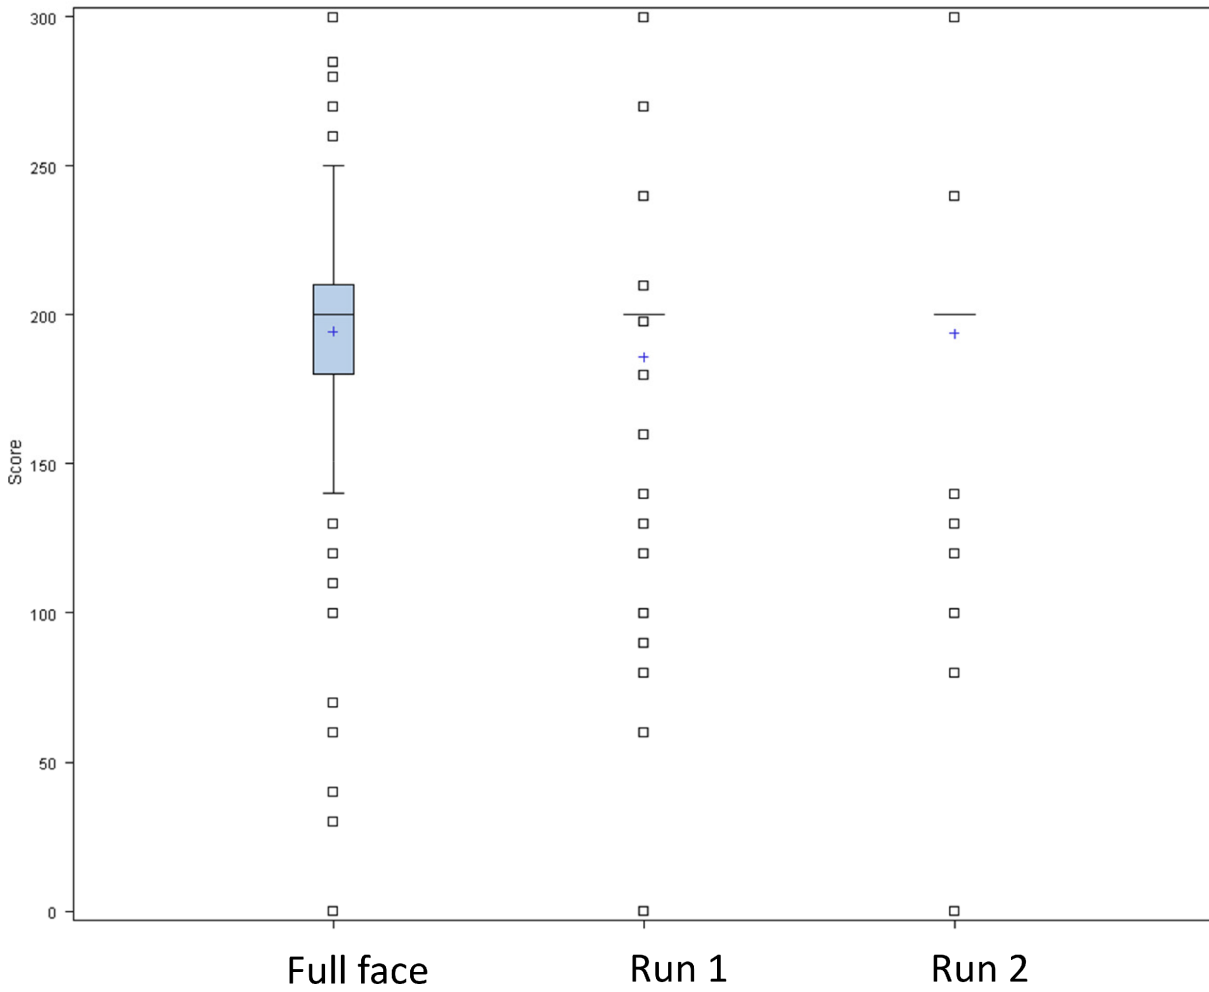

Supplementary Figure 1: Box and whisker plot of the FKBPL scores from 140 full face sections provided by Nottingham compared with scores obtained from TMAs on two separate runs.

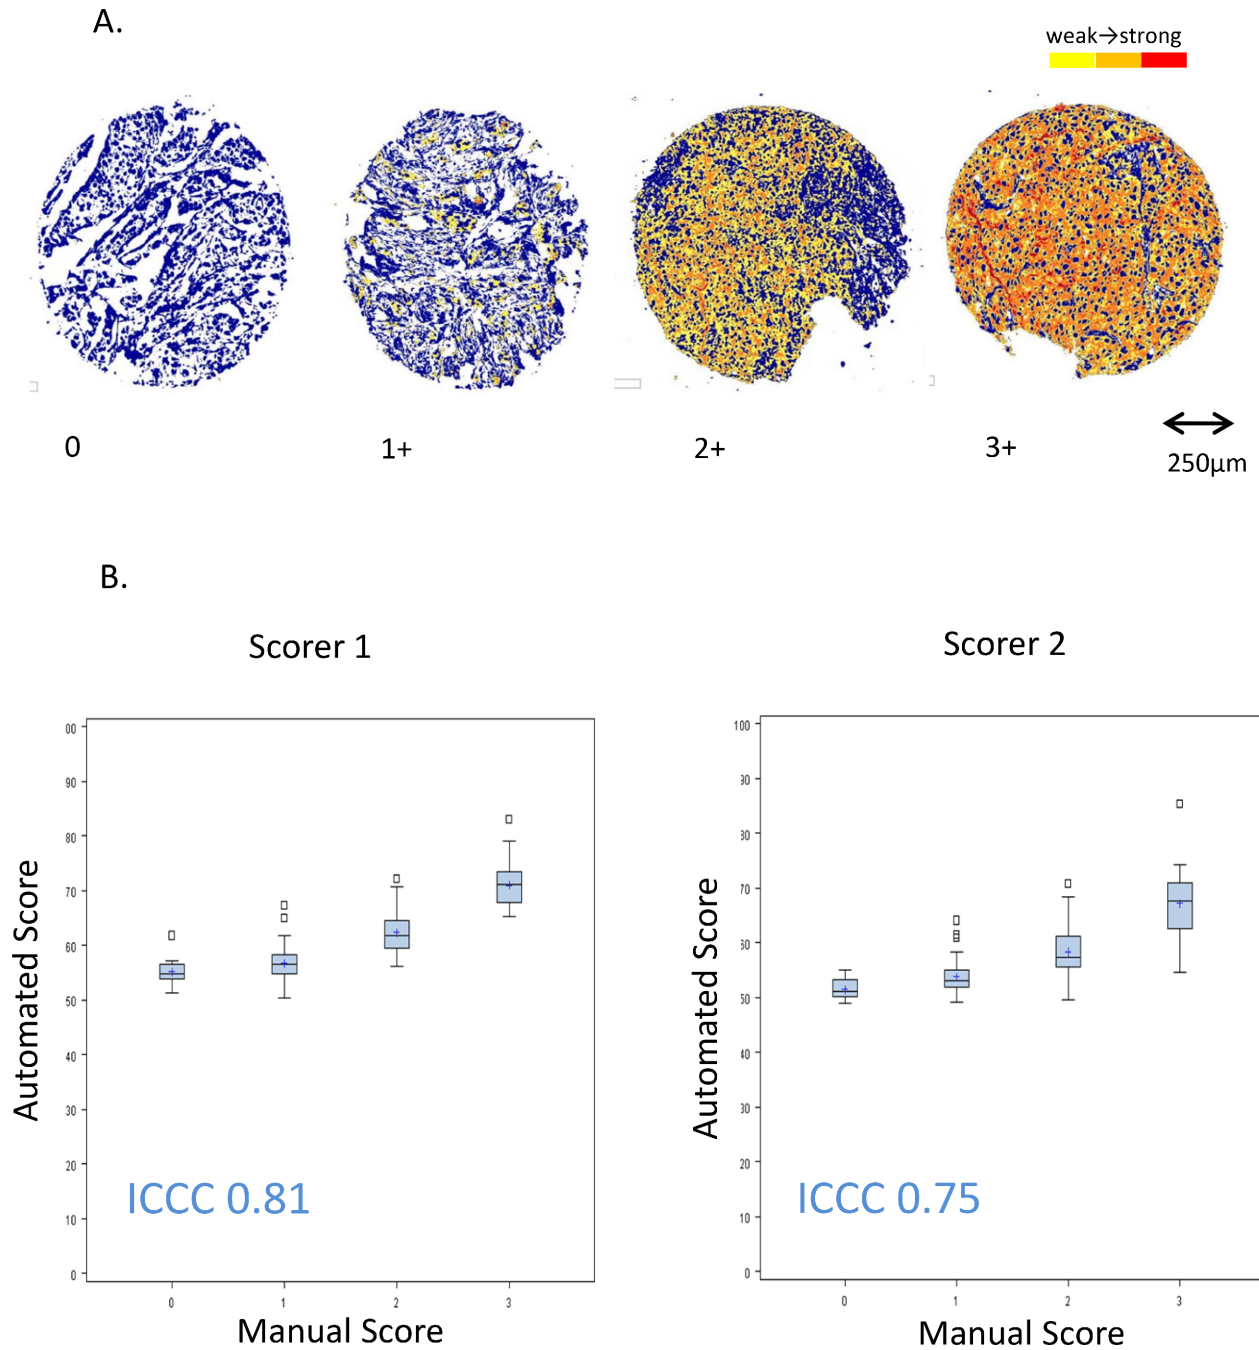

**Supplementary Figure 2: Comparison of automated and manual scoring methods of FKBPL staining intensity within 263 tumour cores (cohort I).** (A) Expression levels of FKBPL protein as detected by the automated system and (B) a box and whisker plot comparing the automated and manual scores for two scorers separately.
